# Supplementary material
Source: PubMed Central journal article supplement (PMC5853648)
Supplement: bi7b00570_si_001.pdf [file bi7b00570_si_001.pdf]

Supporting Information

***Staphylococcus aureus* CidC is a putative pyruvate:menaquinone oxidoreductase**

Xinyan Zhang<sup>‡</sup>, Kenneth W Bayles<sup>§\*</sup>, and Sorin Luca<sup>‡</sup>

<sup>‡</sup>Department of Pharmaceutical Sciences and <sup>§</sup>Department of Pathology & Microbiology, University of Nebraska Medical Center, Omaha, NE 68198-5900.

\*Corresponding author: Kenneth W. Bayles  
Department of Pathology & Microbiology  
University of Nebraska Medical Center  
985900 Nebraska Medical Center  
Omaha, NE 68198-5900  
Tel: 402-559-4945  
Email: kbayles@unmc.edu

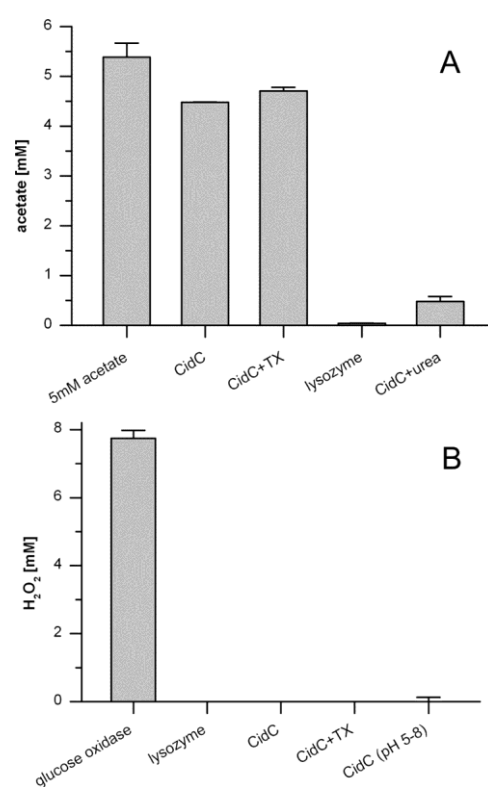

**Figure S1. Products of the CidC enzyme.** The production of either (A) acetate or (B) H<sub>2</sub>O<sub>2</sub> by CidC was measured. (A) 5 mM acetate was used as a positive control. Acetate production was then measured as catalyzed by CidC, CidC with Triton X-100 (CidC+TX), lysozyme (negative control) and 3 M urea-denatured CidC (CidC+urea). (B) H<sub>2</sub>O<sub>2</sub> production as catalyzed by glucose oxidase (positive control), lysozyme (negative control), CidC, CidC with Triton X-100 (CidC+TX). A range of pH values from 5 to 8 in steps of 0.25 was investigated for CidC, but no

H<sub>2</sub>O<sub>2</sub> levels were detected and the data is shown in aggregate as an average and labeled CidC (pH 5-8).

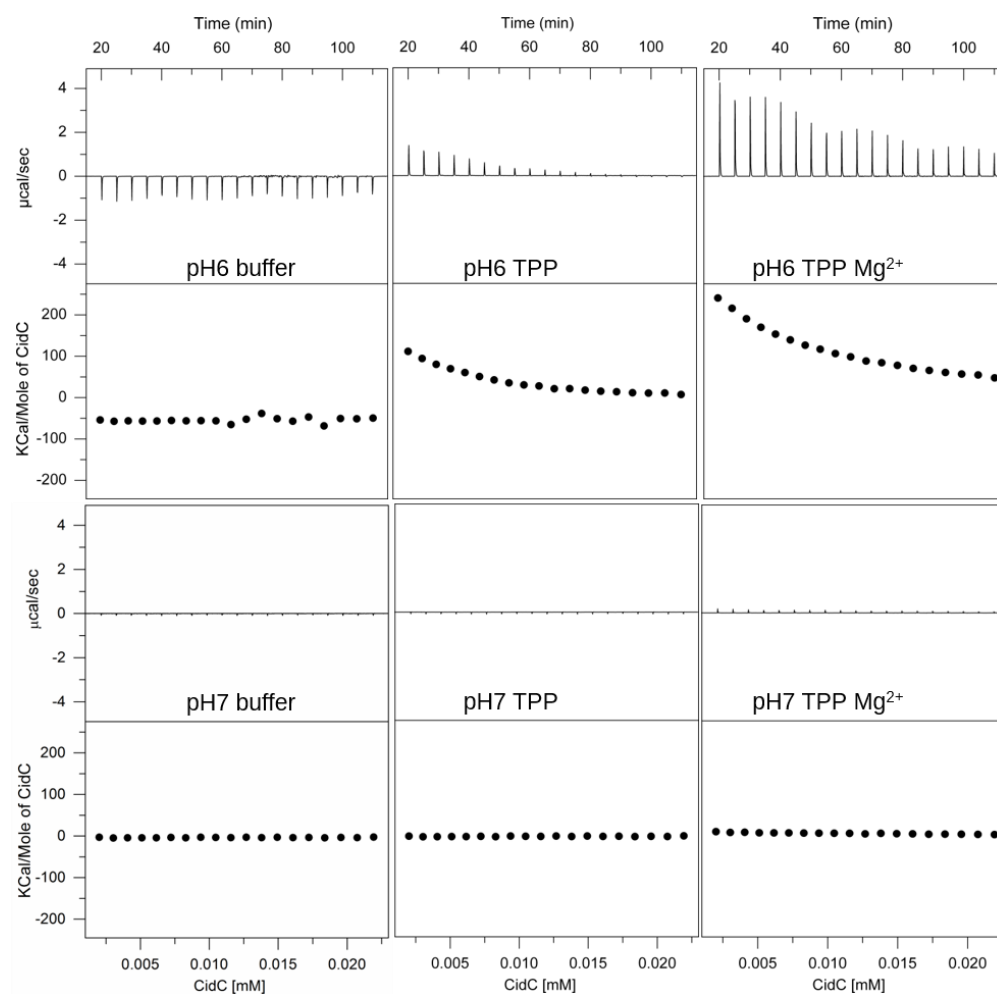

**Figure S2. ITC studies of the TPP/Mg<sup>2+</sup> binding to CidC.** CidC in pH 7 buffer is injected into pH 6 or pH 7 buffer containing nothing else, TPP, TPP/Mg<sup>2+</sup>. Each panel contains (top) the raw ITC data and (bottom) the integrated ITC data. The x-axis is labeled as both the timing of the injection and the CidC concentration in the ITC cell.

**Table S1. p*K*<sub>a</sub> values of CidC catalyzed reaction.**

|                        | p <i>K</i> <sub>HE</sub> | p <i>K</i> <sub>H<sub>2</sub>E</sub> | p <i>K</i> <sub>HES</sub> | p <i>K</i> <sub>H<sub>2</sub>ES</sub> |
|------------------------|--------------------------|--------------------------------------|---------------------------|---------------------------------------|
| -liposome <sup>a</sup> | 5.6                      | 5.4                                  | 7.4                       | 4.2                                   |
| +liposome <sup>a</sup> | 5.9                      | 5.1                                  | 7.2                       | 4.0                                   |

<sup>a</sup>all pH values with ± 0.2 pH unit errors
